# Supplementary material for: The fear of spiders: perceptual features assessed in augmented reality
Source: Frontiers journal article supplement (doi:10.3389/fnbeh.2024.1355879), 2024-02-21

## RATIONALE

Are **arachnophobic** persons afraid of all spiders, or they share *preferences* about their **perceptual features**?

## SAMPLE

56 volunteers differing for **self-reported** levels of fear for spiders (SPQ)

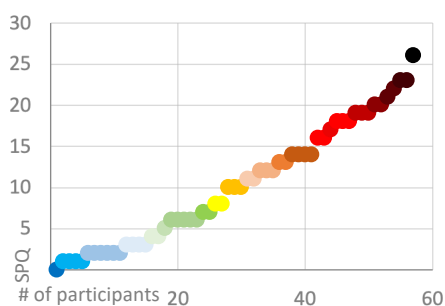

## EXPERIMENTAL SETTING IN AUGMENTED REALITY

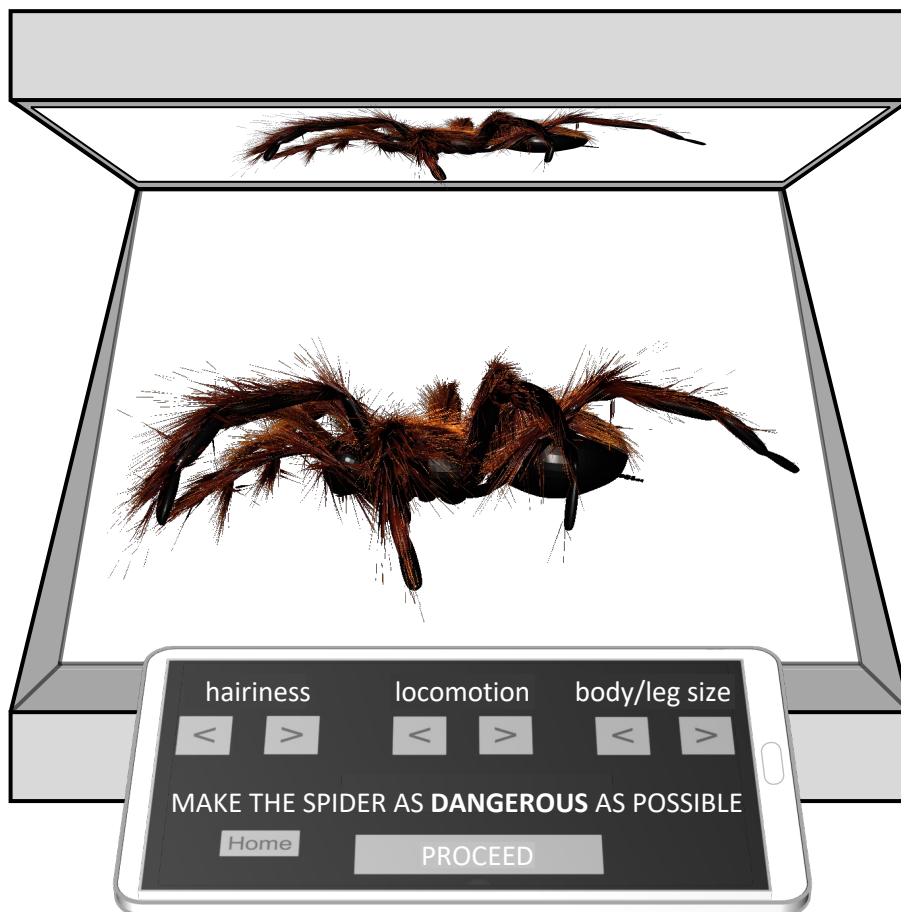

## RESULTS

Arachnophobic persons tend to **generalize** fear. However, *on average*:

- **dangerous** spiders are *fat, hairy, and crawl* like a spider

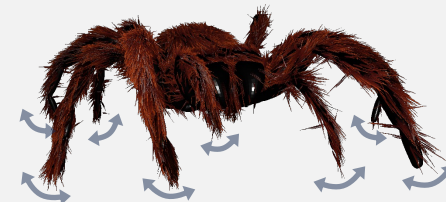

- **harmless** spiders are *thin, hairless, and fly* like a butterfly

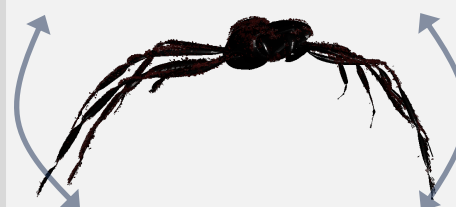

Supplement: Image_1.pdf [file Image_1.pdf]
